# Supplementary material
Source: publisher figshare collection journal article supplement (https://acs.figshare.com/ndownloader/files/4328731)
Supplement: Supplementary file 1 [file 4328731]

# checkCIF/PLATON report (publication check)

No syntax errors found.  
Please wait while processing ....

[CIF dictionary](#)  
[Interpreting this report](#)

## Datablock: complex1

---

|                 |                |                    |
|-----------------|----------------|--------------------|
| Bond precision: | C-C = 0.0065 A | Wavelength=0.71073 |
|-----------------|----------------|--------------------|

|       |              |                      |             |
|-------|--------------|----------------------|-------------|
| Cell: | a=11.6822(8) | b=11.7376(8)         | c=6.2220(4) |
|       | alpha=90     | beta=90.0466<br>(18) | gamma=90    |

Temperature: 295 K

|                |                   |                   |
|----------------|-------------------|-------------------|
|                | Calculated        | Reported          |
| Volume         | 853.17(10)        | 853.17(10)        |
| Space group    | P 21/c            | P 21/c            |
| Hall group     | -P 2ybc           | -P 2ybc           |
| Moiety formula | C6 H3 Ag2 Cl O4 S | C6 H3 Ag2 Cl O4 S |
| Sum formula    | C6 H3 Ag2 Cl O4 S | C6 H3 Ag2 Cl O4 S |
| Mr             | 422.34            | 422.33            |
| Dx,g cm-3      | 3.288             | 3.288             |
| Z              | 4                 | 4                 |
| Mu (mm-1)      | 5.125             | 5.125             |
| F000           | 792.0             | 792.0             |
| F000'          | 786.19            |                   |
| h,k,lmax       | 15,15,8           | 15,15,8           |
| Nref           | 1941              | 1937              |
| Tmin,Tmax      | 0.427,0.541       | 0.476,0.578       |
| Tmin'          | 0.414             |                   |

Correction method= MULTI-SCAN

Data completeness= 0.998      Theta(max)= 27.470

R(reflections)= 0.0250( 1830)      wR2(reflections)= 0.0614( 1937)

S = 1.060      Npar= 128

---

The following ALERTS were generated. Each ALERT has the format

[test-name\\_ALERT\\_alert-type\\_alert-level.](#)

Click on the hyperlinks for more details of the test.

---

#### ● Alert level C

|                                   |                           |     |    |      |    |      |    |
|-----------------------------------|---------------------------|-----|----|------|----|------|----|
| <a href="#">PLAT232_ALERT_2_C</a> | Hirshfeld Test Diff (M-X) | Ag1 | -- | O3_d | .. | 5.32 | su |
| <a href="#">PLAT232_ALERT_2_C</a> | Hirshfeld Test Diff (M-X) | Ag2 | -- | O2   | .. | 6.38 | su |

---

#### ● Alert level G

|                                   |                                                |       |      |       |
|-----------------------------------|------------------------------------------------|-------|------|-------|
| <a href="#">PLAT764_ALERT_4_G</a> | Overcomplete CIF Bond List Detected (Rep/Expd) | .     | 1.38 | Ratio |
| <a href="#">PLAT794_ALERT_5_G</a> | Note: Tentative Bond Valency for Ag1           | ..... | 1.02 |       |
| <a href="#">PLAT794_ALERT_5_G</a> | Note: Tentative Bond Valency for Ag2           | ..... | 0.85 |       |

---

0 **ALERT level A** = In general: serious problem  
0 **ALERT level B** = Potentially serious problem  
2 **ALERT level C** = Check and explain  
3 **ALERT level G** = General alerts; check

0 ALERT type 1 CIF construction/syntax error, inconsistent or missing data  
2 ALERT type 2 Indicator that the structure model may be wrong or deficient  
0 ALERT type 3 Indicator that the structure quality may be low  
1 ALERT type 4 Improvement, methodology, query or suggestion  
2 ALERT type 5 Informative message, check

---

## Datablock: complex2

---

Bond precision: C-C = 0.0043 Å Wavelength=0.71073

Cell: a=9.6946(19) b=11.245(2) c=9.2827(19)

alpha=90 beta=100.76(3) gamma=90

Temperature: 295 K

|                        | Calculated        | Reported          |
|------------------------|-------------------|-------------------|
| Volume                 | 994.2(3)          | 994.2(3)          |
| Space group            | P 21/c            | P 21/c            |
| Hall group             | -P 2ybc           | -P 2ybc           |
| Moiety formula         | C6 H5 Ag2 Cl O5 S | C6 H5 Ag2 Cl O5 S |
| Sum formula            | C6 H5 Ag2 Cl O5 S | C6 H5 Ag2 Cl O5 S |
| Mr                     | 440.36            | 440.35            |
| Dx, g cm <sup>-3</sup> | 2.942             | 2.942             |

|                               |               |                                 |
|-------------------------------|---------------|---------------------------------|
| Z                             | 4             | 4                               |
| Mu (mm-1)                     | 4.411         | 4.412                           |
| F000                          | 832.0         | 832.0                           |
| F000'                         | 826.23        |                                 |
| h,k,lmax                      | 12,14,12      | 12,14,12                        |
| Nref                          | 2267          | 2264                            |
| Tmin,Tmax                     | 0.535,0.616   | 0.539,0.642                     |
| Tmin'                         | 0.489         |                                 |
| Correction method= MULTI-SCAN |               |                                 |
| Data completeness=            | 0.999         | Theta(max)= 27.420              |
| R(reflections)=               | 0.0282( 2125) | wR2(reflections)= 0.0710( 2264) |
| S =                           | 1.071         | Npar= 142                       |

---

The following ALERTS were generated. Each ALERT has the format

**test-name\_ALERT\_alert-type\_alert-level.**

Click on the hyperlinks for more details of the test.

---

### ● Alert level C

|                                   |                           |                                  |                     |       |      |           |
|-----------------------------------|---------------------------|----------------------------------|---------------------|-------|------|-----------|
| <a href="#">PLAT220_ALERT_2_C</a> | Large Non-Solvent         | O                                | Ueq(max)/Ueq(min)   | ...   | 3.44 | Ratio     |
| <a href="#">PLAT222_ALERT_3_C</a> | Large Non-Solvent         | H                                | Uiso(max)/Uiso(min) | ...   | 5.22 | Ratio     |
| <a href="#">PLAT232_ALERT_2_C</a> | Hirshfeld Test Diff (M-X) | Ag1                              | --                  | Cl1_b | ..   | 8.17 su   |
| <a href="#">PLAT232_ALERT_2_C</a> | Hirshfeld Test Diff (M-X) | Ag1                              | --                  | C3_f  | ..   | 5.66 su   |
| <a href="#">PLAT232_ALERT_2_C</a> | Hirshfeld Test Diff (M-X) | Ag2                              | --                  | OlW   | ..   | 6.43 su   |
| <a href="#">PLAT242_ALERT_2_C</a> | Check Low                 | Ueq as Compared to Neighbors for |                     |       |      | Ag2       |
| <a href="#">PLAT366_ALERT_2_C</a> | Short? C(sp?)-C(sp?) Bond | C3                               | -                   | C4    | ...  | 1.39 Ang. |
| <a href="#">PLAT366_ALERT_2_C</a> | Short? C(sp?)-C(sp?) Bond | C4                               | -                   | C5    | ...  | 1.39 Ang. |

---

### ● Alert level G

|                                   |                                                |       |            |
|-----------------------------------|------------------------------------------------|-------|------------|
| <a href="#">PLAT860_ALERT_3_G</a> | Note: Number of Least-Squares Restraints       | ..... | 3          |
| <a href="#">PLAT720_ALERT_4_G</a> | Number of Unusual/Non-Standard Labels          | ..... | 2          |
| <a href="#">PLAT764_ALERT_4_G</a> | Overcomplete CIF Bond List Detected (Rep/Expd) | .     | 1.29 Ratio |
| <a href="#">PLAT794_ALERT_5_G</a> | Note: Tentative Bond Valency for Ag1           | ..... | 0.80       |
| <a href="#">PLAT794_ALERT_5_G</a> | Note: Tentative Bond Valency for Ag2           | ..... | 1.01       |

---

- 0 **ALERT level A** = In general: serious problem
- 0 **ALERT level B** = Potentially serious problem
- 8 **ALERT level C** = Check and explain
- 5 **ALERT level G** = General alerts; check

0 ALERT type 1 CIF construction/syntax error, inconsistent or missing data  
7 ALERT type 2 Indicator that the structure model may be wrong or deficient  
2 ALERT type 3 Indicator that the structure quality may be low  
2 ALERT type 4 Improvement, methodology, query or suggestion  
2 ALERT type 5 Informative message, check

---

## Datablock: complex3

---

Bond precision: C-C = 0.0053 A Wavelength=0.71073  
Cell: a=9.7366(19) b=11.322(2) c=9.4589(19)  
alpha=90 beta=101.22(3) gamma=90  
Temperature: 295 K

|                | Calculated        | Reported          |
|----------------|-------------------|-------------------|
| Volume         | 1022.8(4)         | 1022.8(4)         |
| Space group    | P 21/c            | P 21/c            |
| Hall group     | -P 2ybc           | -P 2ybc           |
| Moiety formula | C6 H5 Ag2 Br O5 S | C6 H5 Ag2 Br O5 S |
| Sum formula    | C6 H5 Ag2 Br O5 S | C6 H5 Ag2 Br O5 S |
| Mr             | 484.81            | 484.81            |
| Dx,g cm-3      | 3.148             | 3.148             |
| Z              | 4                 | 4                 |
| Mu (mm-1)      | 7.934             | 7.934             |
| F000           | 904.0             | 904.0             |
| F000'          | 896.59            |                   |
| h,k,lmax       | 12,14,12          | 12,14,12          |
| Nref           | 2339              | 2335              |
| Tmin,Tmax      | 0.332,0.490       | 0.382,0.535       |
| Tmin'          | 0.292             |                   |

Correction method= MULTI-SCAN  
Data completeness= 0.998 Theta(max)= 27.440  
R(reflections)= 0.0296( 2061) wR2(reflections)= 0.0748( 2335)  
S = 1.073 Npar= 142

---

The following ALERTS were generated. Each ALERT has the format

[test-name\\_ALERT\\_alert-type\\_alert-level.](#)

Click on the hyperlinks for more details of the test.

---

#### ● Alert level B

[PLAT232\\_ALERT\\_2\\_B](#) Hirshfeld Test Diff (M-X) Ag1 -- Br1\_d .. 15.86 su

---

#### ● Alert level C

[PLAT220\\_ALERT\\_2\\_C](#) Large Non-Solvent O Ueq(max)/Ueq(min) ... 3.20 Ratio  
[PLAT222\\_ALERT\\_3\\_C](#) Large Non-Solvent H Uiso(max)/Uiso(min) ... 4.78 Ratio  
[PLAT232\\_ALERT\\_2\\_C](#) Hirshfeld Test Diff (M-X) Ag2 -- OlW .. 5.76 su  
[PLAT242\\_ALERT\\_2\\_C](#) Check Low Ueq as Compared to Neighbors for Ag2  
[PLAT366\\_ALERT\\_2\\_C](#) Short? C(sp?)-C(sp?) Bond C3 - C4 ... 1.38 Ang.

---

#### ● Alert level G

[PLAT860\\_ALERT\\_3\\_G](#) Note: Number of Least-Squares Restraints ..... 3  
[PLAT720\\_ALERT\\_4\\_G](#) Number of Unusual/Non-Standard Labels ..... 2  
[PLAT764\\_ALERT\\_4\\_G](#) Overcomplete CIF Bond List Detected (Rep/Expd) . 1.40 Ratio  
[PLAT794\\_ALERT\\_5\\_G](#) Note: Tentative Bond Valency for Ag1 ..... 0.68  
[PLAT794\\_ALERT\\_5\\_G](#) Note: Tentative Bond Valency for Ag2 ..... 0.95

---

0 **ALERT level A** = In general: serious problem  
1 **ALERT level B** = Potentially serious problem  
5 **ALERT level C** = Check and explain  
5 **ALERT level G** = General alerts; check

0 ALERT type 1 CIF construction/syntax error, inconsistent or missing data  
5 ALERT type 2 Indicator that the structure model may be wrong or deficient  
2 ALERT type 3 Indicator that the structure quality may be low  
2 ALERT type 4 Improvement, methodology, query or suggestion  
2 ALERT type 5 Informative message, check

---

## Datablock: complex4

---

Bond precision: C-C = 0.0068 Å Wavelength=0.71073

Cell: a=11.761(2) b=23.561(5) c=5.7475(11)

alpha=90 beta=91.35(3) gamma=90

Temperature: 295 K

Calculated

Reported

|                    |                              |                                 |
|--------------------|------------------------------|---------------------------------|
| Volume             | 1592.2(5)                    | 1592.2(5)                       |
| Space group        | C 2/m                        | C 2/m                           |
| Hall group         | -C 2y                        | -C 2y                           |
| Moiety formula     | C6 H2 Ag4 N O11 S2, Ag H6 N2 | C6 H2 Ag4 N O11 S2, Ag H6 N2    |
| Sum formula        | C6 H8 Ag5 N3 O11 S2          | C6 H8 Ag5 N3 O11 S2             |
| Mr                 | 901.64                       | 901.62                          |
| Dx,g cm-3          | 3.761                        | 3.761                           |
| Z                  | 4                            | 4                               |
| Mu (mm-1)          | 6.370                        | 6.370                           |
| F000               | 1680.0                       | 1680.0                          |
| F000'              | 1663.71                      |                                 |
| h,k,lmax           | 15,30,7                      | 15,30,7                         |
| Nref               | 1879                         | 1868                            |
| Tmin,Tmax          | 0.273,0.410                  | 0.348,0.469                     |
| Tmin'              | 0.252                        |                                 |
| Correction method= | MULTI-SCAN                   |                                 |
| Data completeness= | 0.994                        | Theta(max)= 27.470              |
| R(reflections)=    | 0.0494( 1736)                | wR2(reflections)= 0.1259( 1868) |
| S =                | 1.083                        | Npar= 139                       |

---

The following ALERTS were generated. Each ALERT has the format

**test-name\_ALERT\_alert-type\_alert-level.**

Click on the hyperlinks for more details of the test.

---

### ● Alert level C

|                                   |                      |                                           |     |
|-----------------------------------|----------------------|-------------------------------------------|-----|
| <a href="#">PLAT241_ALERT_2_C</a> | Check High           | Ueq as Compared to Neighbors for          | N1  |
| <a href="#">PLAT242_ALERT_2_C</a> | Check Low            | Ueq as Compared to Neighbors for          | O5  |
| <a href="#">PLAT420_ALERT_2_C</a> | D-H Without Acceptor | N2 - H2N2 ...                             | ?   |
| <a href="#">PLAT420_ALERT_2_C</a> | D-H Without Acceptor | N3 - H3N1 ...                             | ?   |
| <a href="#">PLAT244_ALERT_4_C</a> | Low                  | 'Solvent' Ueq as Compared to Neighbors of | Ag3 |

---

### ● Alert level G

|                                   |                                                  |            |
|-----------------------------------|--------------------------------------------------|------------|
| <a href="#">PLAT083_ALERT_2_G</a> | SHELXL Second Parameter in WGHT Unusually Large. | 16.35      |
| <a href="#">PLAT860_ALERT_3_G</a> | Note: Number of Least-Squares Restraints .....   | 13         |
| <a href="#">PLAT720_ALERT_4_G</a> | Number of Unusual/Non-Standard Labels .....      | 4          |
| <a href="#">PLAT764_ALERT_4_G</a> | Overcomplete CIF Bond List Detected (Rep/Expd) . | 1.64 Ratio |
| <a href="#">PLAT794_ALERT_5_G</a> | Note: Tentative Bond Valency for Ag1 .....       | 0.75       |

0 **ALERT level A** = In general: serious problem  
0 **ALERT level B** = Potentially serious problem  
5 **ALERT level C** = Check and explain  
6 **ALERT level G** = General alerts; check

0 ALERT type 1 CIF construction/syntax error, inconsistent or missing data  
5 ALERT type 2 Indicator that the structure model may be wrong or deficient  
1 ALERT type 3 Indicator that the structure quality may be low  
3 ALERT type 4 Improvement, methodology, query or suggestion  
2 ALERT type 5 Informative message, check

---

## checkCIF publication errors

---

### Alert level A

[PUBL004\\_ALERT\\_1\\_A](#) The contact author's name and address are missing,  
\_publ\_contact\_author\_name and \_publ\_contact\_author\_address.

[PUBL005\\_ALERT\\_1\\_A](#) \_publ\_contact\_author\_email, \_publ\_contact\_author\_fax and  
\_publ\_contact\_author\_phone are all missing.  
At least one of these should be present.

[PUBL006\\_ALERT\\_1\\_A](#) \_publ\_requested\_journal is missing  
e.g. 'Acta Crystallographica Section C'

[PUBL008\\_ALERT\\_1\\_A](#) \_publ\_section\_title is missing. Title of paper.

[PUBL009\\_ALERT\\_1\\_A](#) \_publ\_author\_name is missing. List of author(s) name(s).

[PUBL010\\_ALERT\\_1\\_A](#) \_publ\_author\_address is missing. Author(s) address(es).

[PUBL012\\_ALERT\\_1\\_A](#) \_publ\_section\_abstract is missing.  
Abstract of paper in English.

---

### Alert level G

[PUBL013\\_ALERT\\_1\\_G](#) The \_publ\_section\_comment (discussion of study) is  
missing. This is required for a full paper submission (but is  
optional for an electronic paper).

[PUBL017\\_ALERT\\_1\\_G](#) The \_publ\_section\_references section is missing or  
empty.

---

7 **ALERT level A** = Data missing that is essential or data in wrong format  
2 **ALERT level G** = General alerts. Data that may be required is missing

---

## Publication of your CIF

You should always attempt to resolve as many as possible of the alerts in all categories. Often the minor alerts point to easily fixed oversights, errors and omissions in your CIF or refinement strategy, so attention to these fine details can be worthwhile. In order to resolve some of the more serious problems it may be necessary to carry out additional measurements or structure refinements. However, the nature of your study may justify the reported deviations from the submission requirements of the journal and these should be commented upon in the discussion or experimental section of a paper - after all, they might represent an interesting feature.

If level A alerts remain, which you believe to be justified deviations, and you intend to submit this CIF for publication in Acta Crystallographica Section C or Section E, you should additionally insert an explanation in your CIF using the Validation Reply Form (VRF) below. Your explanation will be considered as part of the review process.

If you intend to submit to another section of Acta Crystallographica or Journal of Applied Crystallography or Journal of Synchrotron Radiation, you should make sure that at least a [basic structural check](#) is run on the final version of your CIF prior to submission.

```
# start Validation Reply Form
_vrf_PUBL004_GLOBAL
;
PROBLEM: The contact author's name and address are missing,
RESPONSE: ...
;
_vrf_PUBL005_GLOBAL
;
PROBLEM: _publ_contact_author_email, _publ_contact_author_fax and
RESPONSE: ...
;
_vrf_PUBL006_GLOBAL
;
PROBLEM: _publ_requested_journal is missing
RESPONSE: ...
;
_vrf_PUBL008_GLOBAL
;
```

```
PROBLEM: _publ_section_title is missing. Title of paper.
RESPONSE: ...
;
_vrf_PUBL009_GLOBAL
;
PROBLEM: _publ_author_name is missing. List of author(s) name(s).
RESPONSE: ...
;
_vrf_PUBL010_GLOBAL
;
PROBLEM: _publ_author_address is missing. Author(s) address(es).
RESPONSE: ...
;
_vrf_PUBL012_GLOBAL
;
PROBLEM: _publ_section_abstract is missing.
RESPONSE: ...
;
# end Validation Reply Form
```

If you wish to submit your CIF for publication in Acta Crystallographica Section C or E, you should upload your CIF via [the web](#). If your CIF is to form part of a submission to another IUCr journal, you will be asked, either during electronic [submission](#) or by the Co-editor handling your paper, to upload your CIF via our web site.

---

**PLATON version of 22/10/2010; check.def file version of 11/10/2010**

**Datablock complex1 - ellipsoid plot**

NOMOVE FORCED

---

Prob = 50  
Temp = 295

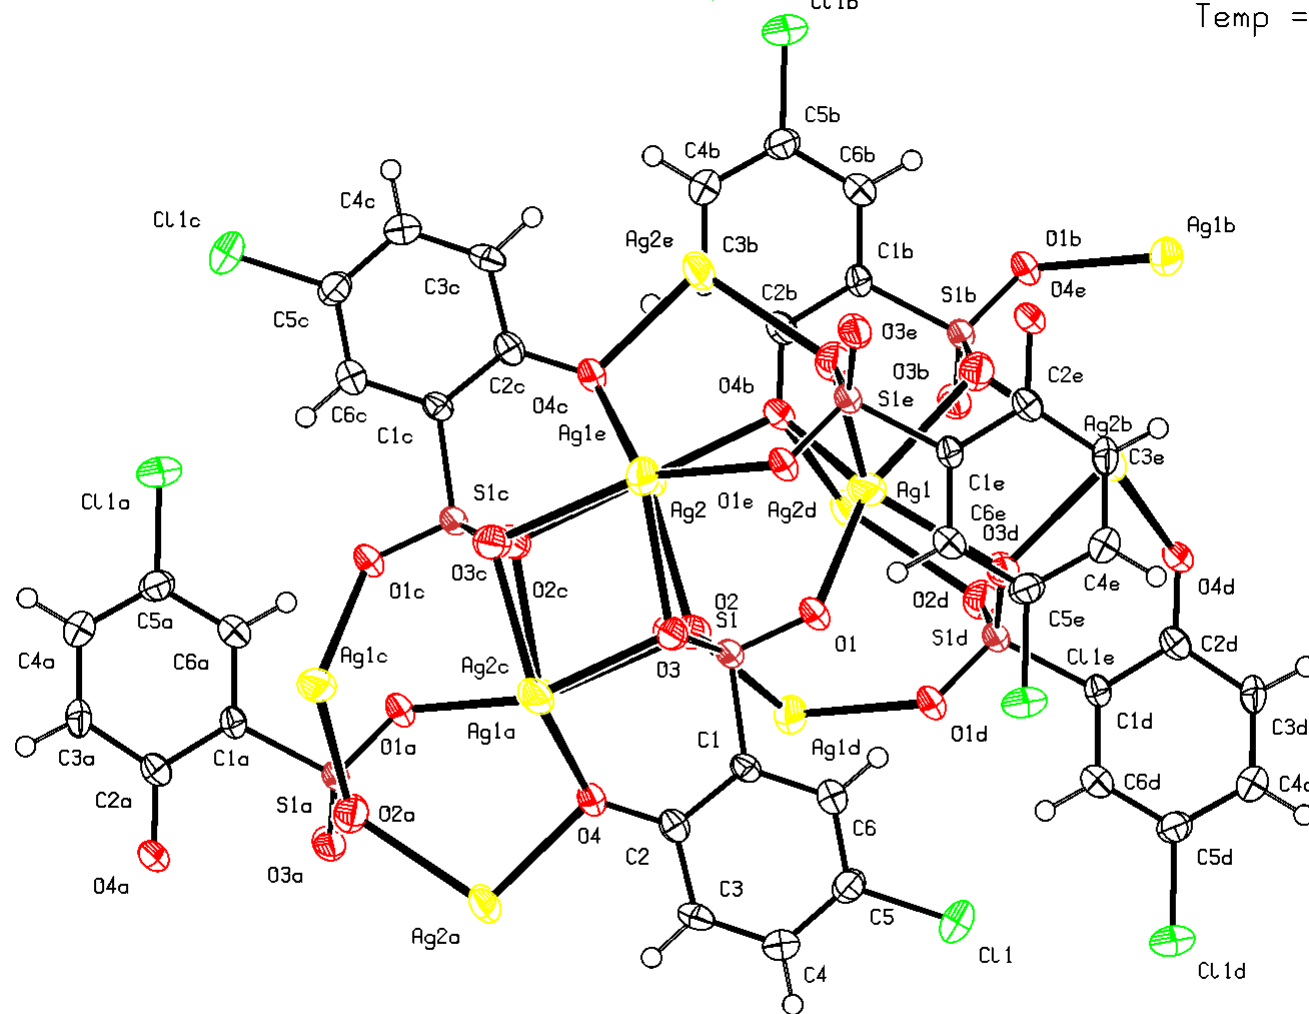

**Datablock complex2** - ellipsoid plot

77 Y

NOMOVE FORCED

Prob = 50  
Temp = 295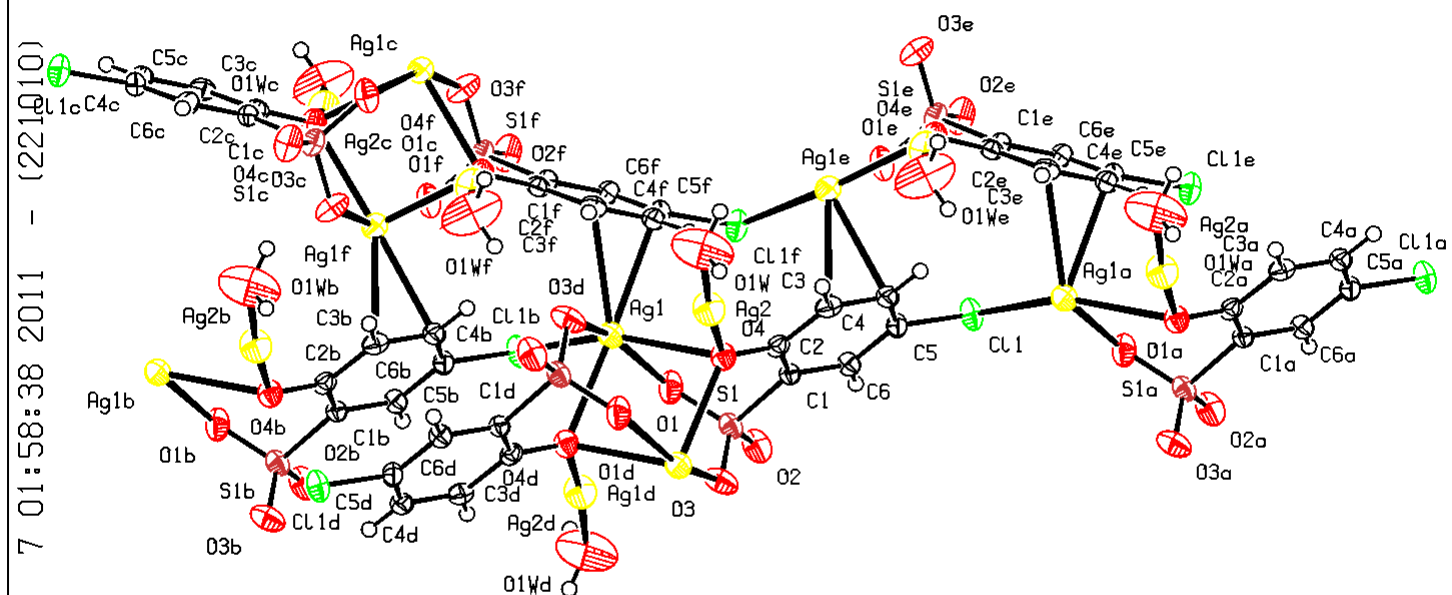

Z -54 complex2 P 21/c

R = 0.03

RES= 0 51 X

**Datablock complex3** - ellipsoid plot



**Datablock complex4** - ellipsoid plot

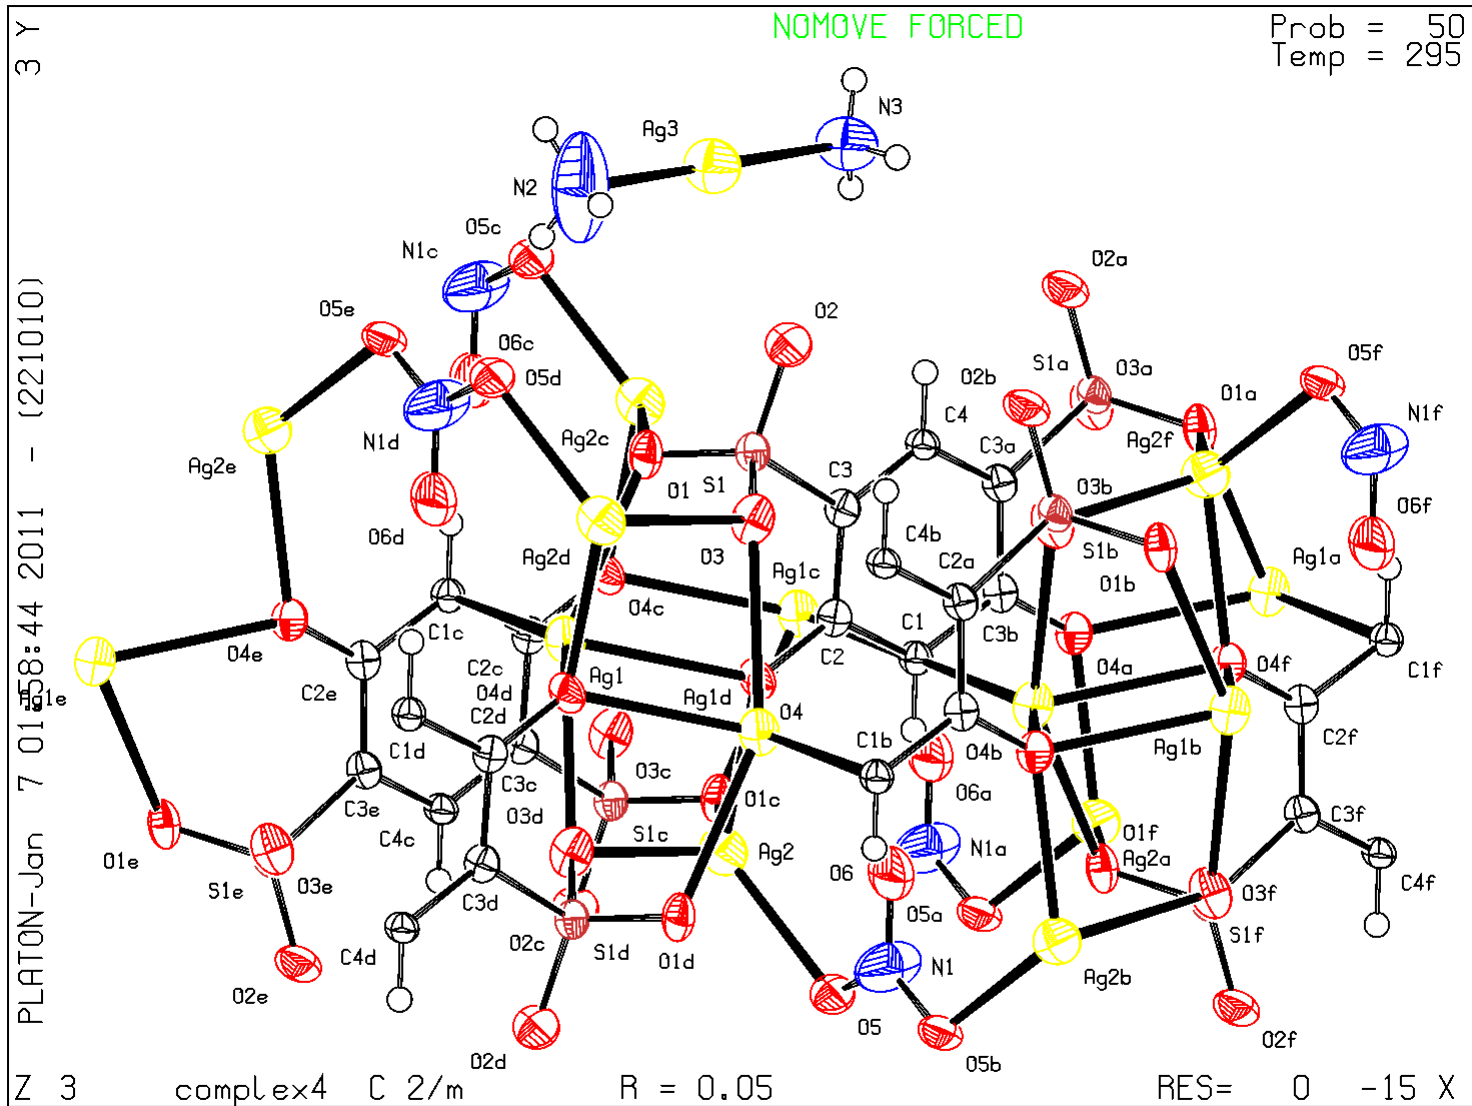

[Download CIF editor \(publCIF\) from the IUCr](#)

[Download CIF editor \(enCIFer\) from the CCDC](#)

[Test a new CIF entry](#)
